# Supplementary material
Source: Research Square preprint supplement (doi:10.21203/rs.3.rs-9117525/v1)
Supplement: Supplementary file 1 [file 0bb28fbcc2ab69bc154b2935.pdf]

**Supplementary Figure**

This study did not include any gel electrophoresis or blotting experiments. Therefore, no uncropped gels or blots are available.
